# Supplementary material for: YAP activation is robust to dilution
Source: Royal Society of Chemistry journal article supplement (doi:10.1039/d4mo00100a), 2024-08-14
Supplement: d4mo00100a1.pdf [file d4mo00100a1.pdf]

## Supplemental Information

A guide to the datasets used in this study:

- YAP concentration decreases with increasing cell size: Sero et al, mol sys bio, 2015
- YAP concentration, but not scaling, is sensitive to DNA-content and cell cycle progression: Sero et al, mol sys bio, 2015 / Sero novel to this study
- A constant nuclear concentration of YAP is maintained across cell sizes despite whole cell dilution: Sero et al, mol sys bio, 2015
- the nuclear YAP concentration is associated with altered RAS and nuclear transport signalling processes: M.Arias-Garcia, M.Beykou, novel to this study
- YAP dilution behavior is conserved across melanoma and RPE cells: L.Dent, T. Pal Chaudhuri, novel to this study
- 231/LM2 after the MEKi and LM2 after the CDK4/6 inhibitor. M.Arias-Garcia, novel to this study
- YAP RNAi experiments: P.Pascual-Vargas, Scientific data, 2017

**A. YAP abundance and concentration scaling but not N/C ratio are insensitive to cell crowding.** Cell size and YAP activation have previously been associated with cell crowding, cell-cell adhesion, and contact inhibition. In our cell lines, cell area negatively correlated with neighbour fraction (NF), raising the possibility that the observed YAP sub-scaling was driven by the NF (Supp.Fig.2). To investigate this, we first quantified the extent to which YAP scaled with NF, noticing a strong positive association at high NF's (0.4 -1), in accordance with the area correlation. However, when clustering the cells on NF, and conducting a scaling analysis between YAP concentration and cell area within each NF group, we observed no change in the YAP concentration per size or 'b' across clusters (Supp.Fig.3). From these data, we concluded it is the NF's influence on cell area that is driving the NF-YAP scaling relationship rather than any direct effect of the neighbour fraction. We conducted the same analysis for actin abundance, noting the same effect. Interestingly, in several lines the YAP N/C ratio exhibited a NF sensitivity (Supp.Fig.3).

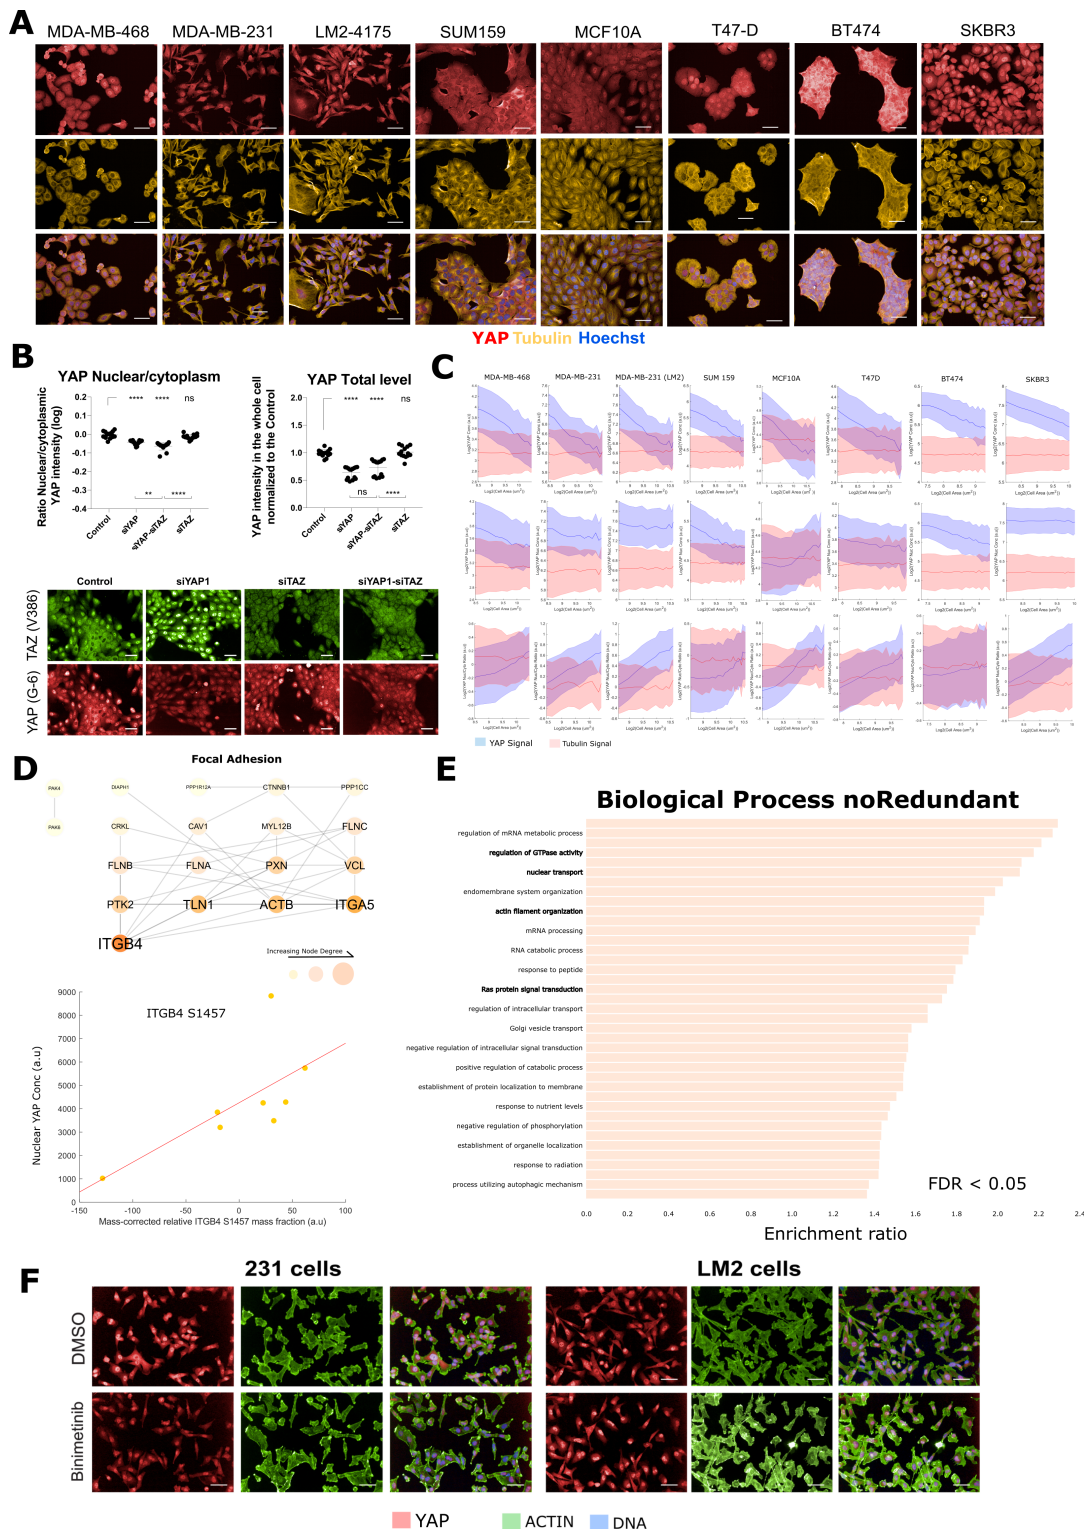

S. Figure 1: Representative images of the 8-lines across which we conducted phospho-proteomic experiments. Scale bar denotes 50µm, YAP in red, tubulin in yellow, DNA stain in blue. B) Validation of the YAP (G-6) antibody used in this imaging. (left) Quantification of the YAP nuc/cyto ratio using the YAP G-6 antibody under various knockdown conditions. TAZ is included here due to the common overlap in antibody specificity. (Right) Quantification of the YAP whole cell intensity using the YAP G-6 antibody under various knockdown conditions. TAZ is included here due to the common overlap in antibody specificity. (Bottom) representative images from each treatment. C) Recapitulation of whole cell YAP dilution with increasing cell size and perfectly scaling nuclear concentration against a tubulin standard in a separate experiment and cell line panel. The central line denotes the mean YAP cytoplasmic concentration (TOP), nuclear concentration (MID) or N/C ratio (BOT) in each size bin. The error bars correspond to one standard deviation in that bin. Tubulin signal is shown in red and YAP in blue. D) A network of the interacting members of the phosphopeptides predictive of the nuclear YAP concentration under the 'Focal Adhesion' KEGG pathway. Interactions were derived from the STRING database, only experimentally determined physical interactions are shown. Node size, label size and colour are proportional to the node degree. (Bottom) Example relationships between the nuclear YAP concentration and enriched phosphopeptides from the 'Focal Adhesion' KEGG pathway. E) Themes from the biological process noRedundant dataset enriched in the list of phosphopeptides most predictive of a cells nuclear:cytoplasmic YAP ratio. All enrichments are significant to  $FDR < 0.05$ . F) Representative images demonstrating the effects of binimetinib treatment on YAP abundance and translocation. Scale bar denotes 50µm, YAP in red, actin in green, DNA stain in blue.

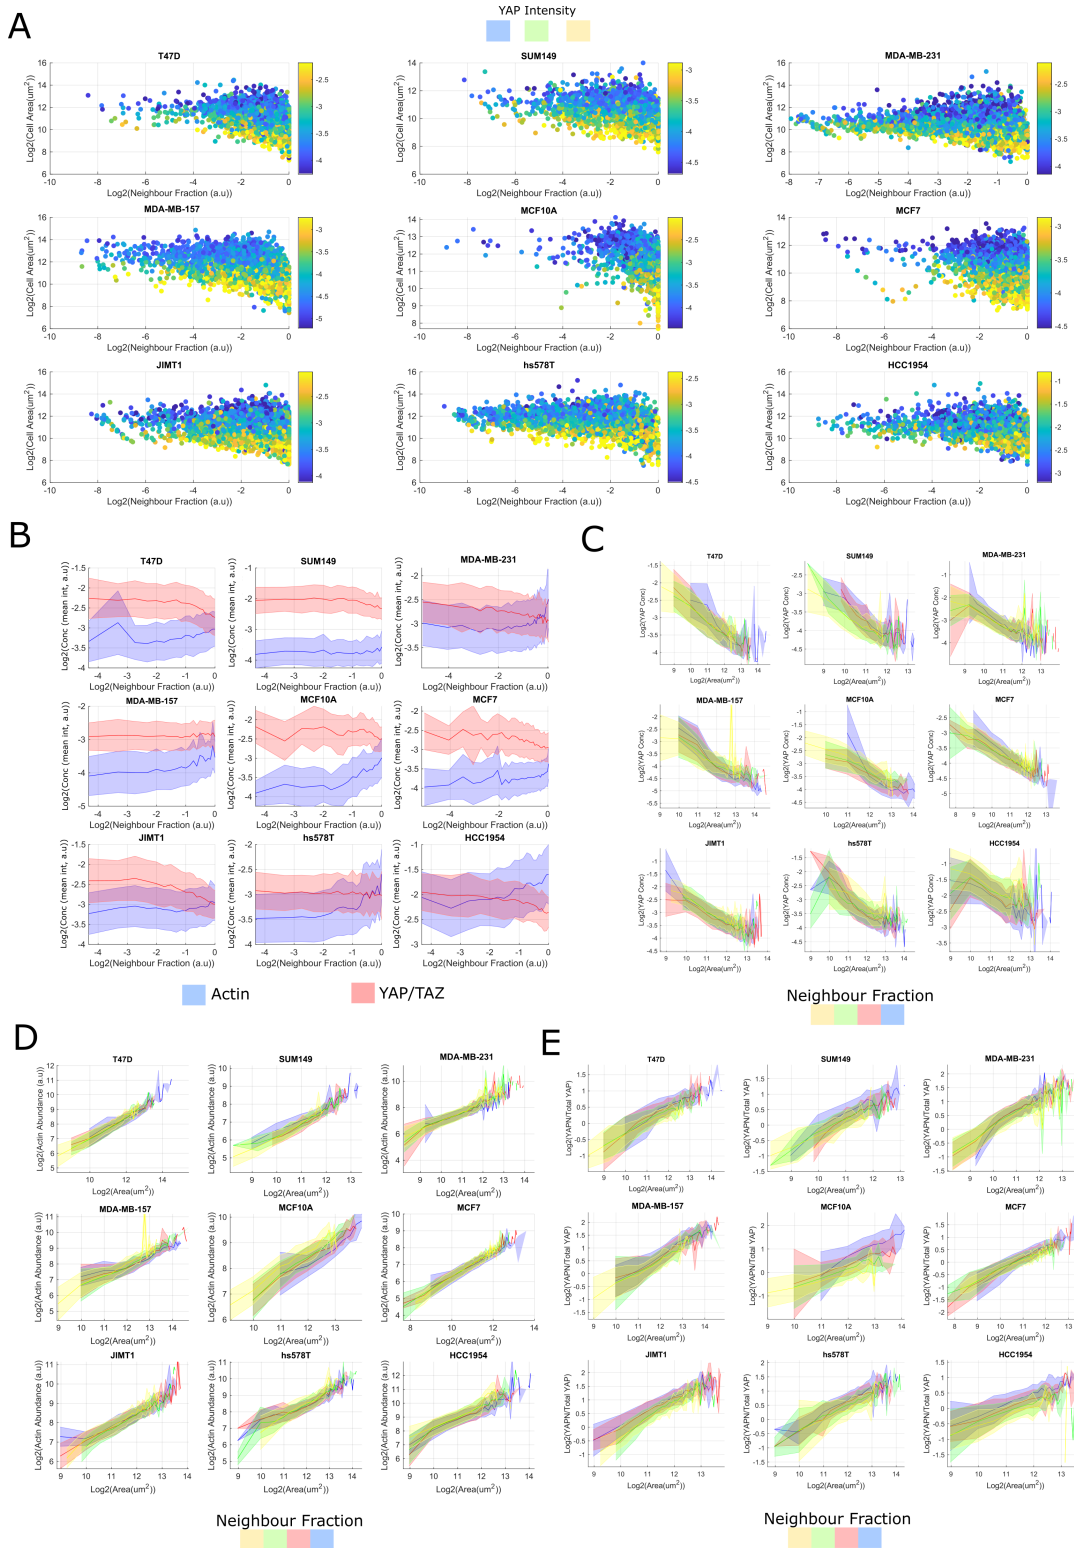

S.Figure 2: The effect of neighbour fraction on YAP scaling A) Log-log plots relating single cell neighbour fraction and cell area. Colour is proportional to the mean YAP intensity (concentration). Area and NF negatively correlate at high (close to 1) neighbour fractions. B) Log-log plots relating YAP/TAZ (blue) and Actin (red) concentration to single-cell neighbour fraction. Assuming a power-law relationship between protein concentration and cell size, the gradient represents the power to which concentration scales with NF and the y-intercept determines the initial concentration at NF = 0. The shaded area denotes one standard deviation of the cell size distribution about that size bin. C) Log-log plots relating YAP/TAZ concentration and single cell area across lines and each NF bin (lower 25%, 25 -50... etc). Blue represents the lowest NF, then red, green and yellow, the most. The shaded area denotes one standard deviation of the cell size distribution about that size bin. D/E) As in 'C' but relating to YAP abundance (D) or N/C ratio (E).

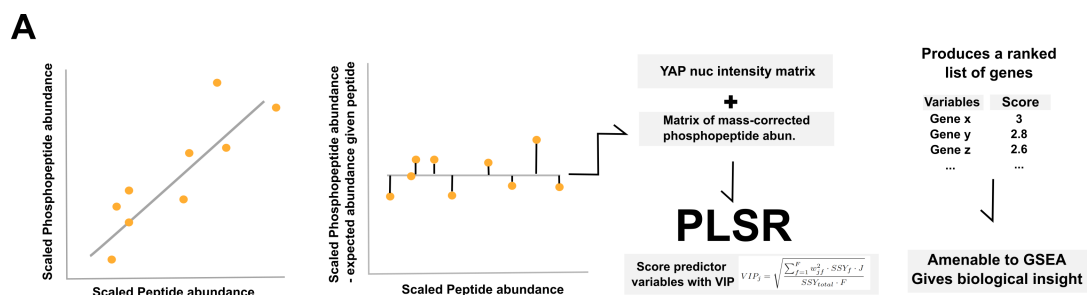

S.Figure 3: Cartoon schematic depicting the basic workflow of the proteomic analysis. A linear model built predicting the scaled abundance of a phosphopeptide in each line from the corresponding peptide abundance. The fitted values are then subtracted from the phosphopeptide abundances to get an 'excess phosphorylation'. These are used to construct a PLSR model to predict YAP nuclear intensity across lines. We use the VIP score to assess how much the abundance of any one phosphopeptide contributes to the model. This provides a ranked list which we may use in down stream ontological analyses.

**Table 1. Actin Concentration Scaling: Scaling parameter values for each cell line across DNA bins within each 'K', the cluster number used in kmeans clustering on the integrated Hoechst intensity. Log(a) is proportional to the initial Actin concentration and b is the power to which Actin concentration scales with cell area.**

| DNA bin     | $K = 1$ |         | $K = 2$ |         | $K = 3$ |         | $K = 4$ |         |
|-------------|---------|---------|---------|---------|---------|---------|---------|---------|
|             | log(a)  | b       | log(a)  | b       | log(a)  | b       | log(a)  | b       |
| T47D 1      | -3.3179 | 0.0687  | -3.2756 | 0.0641  | -3.4727 | 0.0805  | -3.4144 | 0.0737  |
| 2           | 0       | 0       | -2.9920 | 0.0443  | -2.7778 | 0.0216  | -2.7935 | 0.0242  |
| 3           | 0       | 0       | 0       | 0       | -3.1767 | 0.0597  | -2.8385 | 0.0252  |
| 4           | 0       | 0       | 0       | 0       | 0       | 0       | -3.3132 | 0.0714  |
| SUM149 1    | -0.9714 | -0.1097 | -0.9001 | -0.1191 | -0.9215 | -0.1148 | -0.8821 | -0.1215 |
| 2           | 0       | 0       | -0.2076 | -0.1721 | -0.5756 | -0.1302 | -0.2379 | -0.1701 |
| 3           | 0       | 0       | 0       | 0       | 1.0844  | 0.6098  | -1.0573 | -0.0913 |
| 4           | 0       | 0       | 0       | 0       | 0       | 0       | 1.0411  | 0.6147  |
| MDM MB231 1 | -2.2489 | -0.0540 | -2.2831 | -0.0530 | -2.2669 | -0.0549 | -2.2688 | -0.0548 |
| 2           | 0       | 0       | -1.5399 | -0.1158 | -1.8311 | -0.0886 | -1.7991 | -0.0917 |
| 3           | 0       | 0       | 0       | 0       | -1.7875 | -0.0975 | -1.6739 | -0.1078 |
| 4           | 0       | 0       | 0       | 0       | 0       | 0       | -3.8237 | 0.0631  |
| MDA MB157 1 | -2.0089 | -0.0793 | -1.8068 | -0.0989 | -1.8722 | -0.0991 | -1.8623 | -0.1003 |
| 2           | 0       | 0       | -0.1318 | -0.2102 | -0.4986 | -0.1980 | -0.3186 | -0.2154 |
| 3           | 0       | 0       | 0       | 0       | -0.1666 | -0.2061 | -0.6992 | -0.1698 |
| 4           | 0       | 0       | 0       | 0       | 0       | 0       | 0.1456  | -0.2286 |
| MCF10A 1    | -2.9218 | 0.0418  | -2.8995 | 0.0397  | -3.0518 | 0.0543  | -3.0728 | 0.0558  |
| 2           | 0       | 0       | -3.3217 | 0.0782  | -2.8176 | 0.0319  | -2.7912 | 0.0300  |
| 3           | 0       | 0       | 0       | 0       | -3.2700 | 0.0738  | -3.2384 | 0.0717  |
| 4           | 0       | 0       | 0       | 0       | 0       | 0       | -7.8482 | 0.4530  |
| MCF7 1      | -3.3127 | 0.0383  | -3.3151 | 0.0390  | -3.3169 | 0.0392  | -3.3723 | 0.0450  |
| 2           | 0       | 0       | -3.4741 | 0.0520  | -3.4073 | 0.0461  | -3.2827 | 0.0339  |
| 3           | 0       | 0       | 0       | 0       | -4.5712 | 0.1516  | -3.3871 | 0.0446  |
| 4           | 0       | 0       | 0       | 0       | 0       | 0       | -4.9569 | 0.1848  |
| JIMT1 1     | -2.0891 | -0.0646 | -2.0323 | -0.0687 | -2.0284 | -0.0690 | -1.9776 | -0.0690 |
| 2           | 0       | 0       | -3.5197 | 0.0557  | -3.4107 | 0.0467  | -2.9770 | 0.0122  |
| 3           | 0       | 0       | 0       | 0       | -5.5725 | 0.2204  | -3.5962 | 0.0617  |
| 4           | 0       | 0       | 0       | 0       | 0       | 0       | -5.3968 | 0.2053  |
| hs578T 1    | -1.7803 | -0.1039 | -1.7005 | -0.1136 | -1.7038 | -0.1134 | -1.6932 | -0.1149 |
| 2           | 0       | 0       | -0.6294 | -0.1903 | -0.5262 | -0.1996 | -0.5156 | -0.2057 |
| 3           | 0       | 0       | 0       | 0       | -1.4700 | -0.1092 | -0.6504 | -0.1871 |
| 4           | 0       | 0       | 0       | 0       | 0       | 0       | -1.1401 | -0.1339 |
| HCC1954 1   | -2.0209 | -0.0155 | -2.2562 | 0.0079  | -2.2716 | 0.0093  | -2.2354 | 0.0064  |
| 2           | 0       | 0       | -1.9495 | -0.0249 | -1.8453 | -0.0326 | -2.5514 | 0.0337  |
| 3           | 0       | 0       | 0       | 0       | -4.0674 | 0.1412  | -2.0490 | -0.0183 |
| 4           | 0       | 0       | 0       | 0       | 0       | 0       | -4.1502 | 0.1473  |

**Table 2. YAP Concentration Scaling: Scaling parameter values for each cell line across DNA bins within each 'K', the cluster number used in kmeans clustering on the integrated Hoechst intensity. Log(a) is proportional to the initial YAP concentration and b is the power to which YAP concentration scales with cell area.**

| DNA bin     | K = 1   |         | K = 2   |         | K = 3   |         | K = 4   |         |
|-------------|---------|---------|---------|---------|---------|---------|---------|---------|
|             | log(a)  | b       | log(a)  | b       | log(a)  | b       | log(a)  | b       |
| T47D 1      | 0.5262  | -0.3407 | 0.8357  | -0.3736 | 0.7975  | -0.3786 | 0.8452  | -0.3840 |
| 2           | 0       | 0       | 2.9510  | -0.5278 | 1.8227  | -0.4566 | 1.8826  | -0.4631 |
| 3           | 0       | 0       | 0       | 0       | 3.0933  | -0.5390 | 3.1395  | -0.5505 |
| 4           | 0       | 0       | 0       | 0       | 0       | 0       | 3.1135  | -0.5360 |
| SUM149 1    | -0.1526 | -0.3459 | 0.1584  | -0.3817 | 0.1982  | -0.3868 | 0.1983  | -0.3868 |
| 2           | 0       | 0       | 0.7172  | -0.4077 | 1.0614  | -0.4432 | 1.1188  | -0.4490 |
| 3           | 0       | 0       | 0       | 0       | 1.2846  | -0.4076 | 1.7730  | -0.4523 |
| 4           | 0       | 0       | 0       | 0       | 0       | 0       | 45.6573 | -3.6959 |
| MDM MB231 1 | 1.3997  | -0.4333 | 1.9765  | -0.4994 | 2.0367  | -0.5074 | 2.0521  | -0.5093 |
| 2           | 0       | 0       | 2.3003  | -0.4980 | 3.0583  | -0.5729 | 3.1612  | -0.5831 |
| 3           | 0       | 0       | 0       | 0       | 2.1716  | -0.4440 | 2.8563  | -0.5097 |
| 4           | 0       | 0       | 0       | 0       | 0       | 0       | 4.9784  | -0.5895 |
| MDA MB157 1 | 0.9423  | -0.4199 | 1.3804  | -0.4621 | 1.2999  | -0.4673 | 1.3195  | -0.4697 |
| 2           | 0       | 0       | 3.8252  | -0.6085 | 3.7629  | -0.6407 | 4.0220  | -0.6665 |
| 3           | 0       | 0       | 0       | 0       | 4.3659  | -0.6457 | 4.0844  | -0.6426 |
| 4           | 0       | 0       | 0       | 0       | 0       | 0       | 4.5864  | -0.6578 |
| MCF10A 1    | 1.6437  | -0.4253 | 1.5918  | -0.4234 | 1.3702  | -0.4065 | 1.3040  | -0.4004 |
| 2           | 0       | 0       | 2.9101  | -0.5091 | 1.9159  | -0.4493 | 1.9286  | -0.4507 |
| 3           | 0       | 0       | 0       | 0       | 2.8531  | -0.5036 | 2.9763  | -0.5163 |
| 4           | 0       | 0       | 0       | 0       | 0       | 0       | -2.1396 | -0.0434 |
| MCF7 1      | -0.3921 | -0.3218 | -0.1148 | -0.3548 | -0.1139 | -0.3555 | -0.1103 | -0.3570 |
| 2           | 0       | 0       | 0.7019  | -0.4104 | 0.8025  | -0.4229 | 0.8121  | -0.4294 |
| 3           | 0       | 0       | 0       | 0       | 1.4729  | -0.4475 | 1.0325  | -0.4406 |
| 4           | 0       | 0       | 0       | 0       | 0       | 0       | 1.5877  | -0.4555 |
| JIMT1 1     | 1.2772  | -0.4002 | 1.9080  | -0.4663 | 2.3463  | -0.5182 | 2.3612  | -0.5201 |
| 2           | 0       | 0       | 3.4679  | -0.5685 | 2.9729  | -0.5514 | 2.9728  | -0.5520 |
| 3           | 0       | 0       | 0       | 0       | 3.5474  | -0.5726 | 3.8726  | -0.6028 |
| 4           | 0       | 0       | 0       | 0       | 0       | 0       | 2.6220  | -0.4405 |
| hs578T 1    | 1.0447  | -0.3858 | 1.4946  | -0.4327 | 1.5253  | -0.4357 | 1.5123  | -0.4376 |
| 2           | 0       | 0       | 2.9914  | -0.5216 | 3.2113  | -0.5420 | 3.4200  | -0.5822 |
| 3           | 0       | 0       | 0       | 0       | 4.4841  | -0.5914 | 3.1357  | -0.5330 |
| 4           | 0       | 0       | 0       | 0       | 0       | 0       | 4.4841  | -0.5914 |
| HCC1954 1   | 1.6923  | -0.3397 | 2.2352  | -0.3970 | 2.3170  | -0.4061 | 2.1364  | -0.3907 |
| 2           | 0       | 0       | 2.7372  | -0.4109 | 3.5686  | -0.4888 | 4.3223  | -0.5697 |
| 3           | 0       | 0       | 0       | 0       | 2.9610  | -0.3894 | 3.2340  | -0.4526 |
| 4           | 0       | 0       | 0       | 0       | 0       | 0       | 2.8783  | -0.3839 |

**Table 3. YAP Abundance Scaling: Scaling parameter values for each cell line across DNA bins within each 'K', the cluster number used in kmeans clustering on the integrated Hoechst intensity. Log(a) is proportional to the initial YAP abundance and b is the power to which YAP abundance scales with cell area.**

| DNA bin     | $K = 1$ |        | $K = 2$ |        | $K = 3$ |        | $K = 4$ |         |
|-------------|---------|--------|---------|--------|---------|--------|---------|---------|
|             | log(a)  | $b$    | log(a)  | $b$    | log(a)  | $b$    | log(a)  | $b$     |
| T47D 1      | 0.4277  | 0.6686 | 0.7347  | 0.6361 | 0.6903  | 0.6323 | 0.7322  | 0.6276  |
| 2           | 0       | 0      | 2.1366  | 0.5428 | 1.5646  | 0.5671 | 1.6178  | 0.5612  |
| 3           | 0       | 0      | 0       | 0      | 2.1900  | 0.5392 | 2.4472  | 0.5098  |
| 4           | 0       | 0      | 0       | 0      | 0       | 0      | 1.9505  | 0.5645  |
| SUM149 1    | -0.4643 | 0.6847 | 0.0267  | 0.6314 | 0.0821  | 0.6248 | 0.0825  | 0.6248  |
| 2           | 0       | 0      | 0.0597  | 0.6538 | 0.8467  | 0.5770 | 0.8475  | 0.5767  |
| 3           | 0       | 0      | 0       | 0      | 1.0844  | 0.6098 | 1.4860  | 0.5738  |
| 4           | 0       | 0      | 0       | 0      | 0       | 0      | 2.6006  | -0.6672 |
| MDM MB231 1 | 1.0130  | 0.6044 | 1.9090  | 0.5073 | 1.9331  | 0.5046 | 1.9596  | 0.4975  |
| 2           | 0       | 0      | 1.6388  | 0.5645 | 1.8648  | 0.5429 | 3.1963  | 0.4086  |
| 3           | 0       | 0      | 0       | 0      | 3.3455  | 0.5263 | 2.2313  | 0.5101  |
| 4           | 0       | 0      | 0       | 0      | 0       | 0      | 1.9114  | 0.5850  |
| MDA MB157 1 | 0.6812  | 0.6033 | 1.1719  | 0.5567 | 1.2103  | 0.5410 | 1.2320  | 0.5387  |
| 2           | 0       | 0      | 3.4952  | 0.4183 | 3.4677  | 0.3848 | 3.5225  | 0.3788  |
| 3           | 0       | 0      | 0       | 0      | 3.9458  | 0.3882 | 4.1585  | 0.3580  |
| 4           | 0       | 0      | 0       | 0      | 0       | 0      | 4.2793  | 0.3727  |
| MCF10A 1    | 1.6390  | 0.5751 | 1.6480  | 0.5714 | 1.6498  | 0.5713 | 1.6498  | 0.5713  |
| 2           | 0       | 0      | 2.8037  | 0.5003 | 2.7770  | 0.5003 | 2.7878  | 0.4994  |
| 3           | 0       | 0      | 0       | 0      | 2.1516  | 0.5918 | 4.5335  | 0.3911  |
| 4           | 0       | 0      | 0       | 0      | 0       | 0      | -6.0728 | 1.2847  |
| MCF7 1      | -0.3816 | 0.6771 | -0.1306 | 0.6468 | -0.1328 | 0.6465 | -0.1416 | 0.6462  |
| 2           | 0       | 0      | 0.6360  | 0.5959 | 0.7930  | 0.5780 | 0.7511  | 0.5766  |
| 3           | 0       | 0      | 0       | 0      | 0.9703  | 0.5988 | 1.0212  | 0.5604  |
| 4           | 0       | 0      | 0       | 0      | 0       | 0      | 1.0781  | 0.5912  |
| JIMT1 1     | 1.1222  | 0.6145 | 1.8581  | 0.5386 | 2.2526  | 0.4911 | 2.2744  | 0.4886  |
| 2           | 0       | 0      | 2.8276  | 0.4879 | 2.8270  | 0.4622 | 2.8235  | 0.4619  |
| 3           | 0       | 0      | 0       | 0      | 2.7701  | 0.4955 | 3.3382  | 0.4442  |
| 4           | 0       | 0      | 0       | 0      | 0       | 0      | 2.2030  | 0.5939  |
| hs578T 1    | 0.7421  | 0.6410 | 1.3691  | 0.5786 | 1.4070  | 0.5749 | 1.4215  | 0.5706  |
| 2           | 0       | 0      | 2.4033  | 0.5281 | 2.7356  | 0.4983 | 2.7658  | 0.4733  |
| 3           | 0       | 0      | 0       | 0      | 4.2205  | 0.4298 | 2.6690  | 0.5064  |
| 4           | 0       | 0      | 0       | 0      | 0       | 0      | 4.2205  | 0.4298  |
| HCC1954 1   | 1.4279  | 0.6852 | 2.2160  | 0.6048 | 2.2937  | 0.5961 | 2.1937  | 0.6037  |
| 2           | 0       | 0      | 2.2640  | 0.6311 | 3.0687  | 0.5562 | 3.8376  | 0.4750  |
| 3           | 0       | 0      | 0       | 0      | 2.0141  | 0.6893 | 2.8693  | 0.5797  |
| 4           | 0       | 0      | 0       | 0      | 0       | 0      | 1.9641  | 0.6916  |

**Table 4. Actin Abundance Scaling: Scaling parameter values for each cell line across DNA bins within each 'K', the cluster number used in kmeans clustering on the integrated Hoechst intensity. Log(a) is proportional to the initial Actin abundance and b is the power to which Actin abundance scales with cell area.**

| DNA bins    | K = 1   |        | K = 2   |        | K = 3   |        | K = 4   |         |
|-------------|---------|--------|---------|--------|---------|--------|---------|---------|
|             | log(a)  | b      | log(a)  | b      | log(a)  | b      | log(a)  | b       |
| T47D 1      | -3.2001 | 1.0575 | -3.1339 | 1.0505 | -3.3154 | 1.0644 | -3.2744 | 1.0600  |
| 2           | 0       | 0      | -2.8217 | 1.0296 | -2.6167 | 1.0068 | -2.6193 | 1.0069  |
| 3           | 0       | 0      | 0       | 0      | -2.9513 | 1.0401 | -3.0228 | 1.0458  |
| 4           | 0       | 0      | 0       | 0      | 0       | 0      | -2.7112 | 1.0198  |
| SUM149 1    | -1.0025 | 0.8933 | -0.9226 | 0.8853 | -0.8855 | 0.8794 | -0.8963 | 0.8799  |
| 2           | 0       | 0      | -0.5366 | 0.8665 | -0.4454 | 0.8500 | -0.2041 | 0.8267  |
| 3           | 0       | 0      | 0       | 0      | 1.0844  | 0.6098 | -1.0362 | 0.9068  |
| 4           | 0       | 0      | 0       | 0      | 0       | 0      | 2.6006  | -0.6672 |
| MDM MB231 1 | -2.1327 | 0.9346 | -2.1865 | 0.9374 | -2.1787 | 0.9363 | -2.1893 | 0.9373  |
| 2           | 0       | 0      | -1.5026 | 0.8807 | -1.6141 | 0.8906 | -1.6281 | 0.8920  |
| 3           | 0       | 0      | 0       | 0      | -1.8453 | 0.9076 | -1.6817 | 0.8933  |
| 4           | 0       | 0      | 0       | 0      | 0       | 0      | -4.4738 | 1.0964  |
| MDA MB157 1 | -2.0519 | 0.9245 | -1.8712 | 0.9069 | -1.9028 | 0.9037 | -1.8963 | 0.9030  |
| 2           | 0       | 0      | -0.2542 | 0.7998 | -0.6160 | 0.8121 | -0.6463 | 0.8144  |
| 3           | 0       | 0      | 0       | 0      | -0.2739 | 0.8025 | 0.0133  | 0.7799  |
| 4           | 0       | 0      | 0       | 0      | 0       | 0      | -2.8673 | 1.0039  |
| MCF10A 1    | -2.8750 | 1.0375 | -2.8209 | 1.0325 | -2.8200 | 1.0324 | -2.9063 | 1.0402  |
| 2           | 0       | 0      | -3.2331 | 1.0704 | -3.2336 | 1.0709 | -2.7583 | 1.0270  |
| 3           | 0       | 0      | 0       | 0      | -3.7696 | 1.1020 | -3.2170 | 1.0698  |
| 4           | 0       | 0      | 0       | 0      | 0       | 0      | -3.8844 | 1.1070  |
| MCF7 1      | -3.2678 | 1.0338 | -3.2629 | 1.0337 | -3.2604 | 1.0334 | -3.2881 | 1.0363  |
| 2           | 0       | 0      | -3.4257 | 1.0474 | -3.3604 | 1.0416 | -3.2727 | 1.0329  |
| 3           | 0       | 0      | 0       | 0      | -4.0509 | 1.1038 | -3.3499 | 1.0411  |
| 4           | 0       | 0      | 0       | 0      | 0       | 0      | -4.2011 | 1.1156  |
| JIMT1 1     | -2.1892 | 0.9449 | -2.0989 | 0.9377 | -2.0804 | 0.9360 | -2.0125 | 0.9346  |
| 2           | 0       | 0      | -3.5629 | 1.0595 | -3.4767 | 1.0526 | -3.0369 | 1.0178  |
| 3           | 0       | 0      | 0       | 0      | -4.8783 | 1.1628 | -3.6001 | 1.0622  |
| 4           | 0       | 0      | 0       | 0      | 0       | 0      | -5.0995 | 1.1809  |
| hs578T 1    | -1.8602 | 0.9031 | -1.6944 | 0.8859 | -1.6927 | 0.8856 | -1.6958 | 0.8858  |
| 2           | 0       | 0      | -1.0074 | 0.8417 | -0.8065 | 0.8242 | -0.7820 | 0.8221  |
| 3           | 0       | 0      | 0       | 0      | -1.7049 | 0.9097 | -1.6399 | 0.9033  |
| 4           | 0       | 0      | 0       | 0      | 0       | 0      | -7.0092 | 1.3349  |
| HCC1954 1   | -1.8894 | 0.9720 | -1.9892 | 0.9821 | -2.0062 | 0.9836 | -1.9986 | 0.9832  |
| 2           | 0       | 0      | -1.9533 | 0.9755 | -1.8147 | 0.9646 | -1.9456 | 0.9784  |
| 3           | 0       | 0      | 0       | 0      | -3.5068 | 1.0947 | -2.2007 | 0.9946  |
| 4           | 0       | 0      | 0       | 0      | 0       | 0      | -3.5954 | 1.1008  |



**Table 5. YAP Ratio Scaling: Scaling parameter values for each cell line across DNA bins within each 'K', the cluster number used in kmeans clustering on the integrated Hoechst intensity. Log(a) is proportional to the initial YAP ratio and b is the power to which YAP ratio scales with cell area.**

| DNA bins    | $K = 1$ |        | $K = 2$ |        | $K = 3$ |        | $K = 4$ |         |
|-------------|---------|--------|---------|--------|---------|--------|---------|---------|
|             | log(a)  | $b$    | log(a)  | $b$    | log(a)  | $b$    | log(a)  | $b$     |
| T47D 1      | -3.7184 | 0.3538 | -3.7698 | 0.3593 | -3.9382 | 0.3771 | -3.9423 | 0.3776  |
| 2           | 0       | 0      | -4.0243 | 0.3765 | -3.7953 | 0.3609 | -3.8076 | 0.3623  |
| 3           | 0       | 0      | 0       | 0      | -4.0252 | 0.3760 | -3.8289 | 0.3634  |
| 4           | 0       | 0      | 0       | 0      | 0       | 0      | -3.9161 | 0.3666  |
| SUM149 1    | -4.5111 | 0.4383 | -4.7306 | 0.4606 | -4.7200 | 0.4595 | -4.7100 | 0.4588  |
| 2           | 0       | 0      | -4.2107 | 0.4077 | -4.2781 | 0.4142 | -4.4984 | 0.4349  |
| 3           | 0       | 0      | 0       | 0      | 1.0844  | 0.6098 | -4.4554 | 0.4250  |
| 4           | 0       | 0      | 0       | 0      | 0       | 0      | 2.6006  | -0.6672 |
| MDM MB231 1 | -4.4381 | 0.4709 | -4.9459 | 0.5227 | -4.9796 | 0.5262 | -5.0023 | 0.5285  |
| 2           | 0       | 0      | -4.0647 | 0.4322 | -4.4357 | 0.4687 | -4.7030 | 0.4967  |
| 3           | 0       | 0      | 0       | 0      | -5.0151 | 0.4960 | -4.2615 | 0.4497  |
| 4           | 0       | 0      | 0       | 0      | 0       | 0      | -5.1602 | 0.5044  |
| MDA MB157 1 | -5.3866 | 0.5074 | -5.4141 | 0.5103 | -5.3701 | 0.5064 | -5.3665 | 0.5061  |
| 2           | 0       | 0      | -6.1785 | 0.5649 | -5.5694 | 0.5231 | -5.5672 | 0.5231  |
| 3           | 0       | 0      | 0       | 0      | -6.0631 | 0.5545 | -6.3036 | 0.5738  |
| 4           | 0       | 0      | 0       | 0      | 0       | 0      | -3.6657 | 0.3590  |
| MCF10A 1    | -4.9326 | 0.4358 | -4.8611 | 0.4297 | -4.5969 | 0.4077 | -4.5415 | 0.4026  |
| 2           | 0       | 0      | -5.6429 | 0.4947 | -5.1453 | 0.4533 | -5.1558 | 0.4542  |
| 3           | 0       | 0      | 0       | 0      | -5.6250 | 0.4925 | -5.6539 | 0.4970  |
| 4           | 0       | 0      | 0       | 0      | 0       | 0      | -5.2204 | 0.4295  |
| MCF7 1      | -4.1951 | 0.3976 | -4.2538 | 0.4037 | -4.2500 | 0.4032 | -4.2170 | 0.3996  |
| 2           | 0       | 0      | -4.0951 | 0.3876 | -4.1438 | 0.3934 | -4.2358 | 0.4037  |
| 3           | 0       | 0      | 0       | 0      | -4.4485 | 0.4072 | -4.1816 | 0.3956  |
| 4           | 0       | 0      | 0       | 0      | 0       | 0      | -4.4507 | 0.4063  |
| JIMT1 1     | -5.2234 | 0.5266 | -5.6523 | 0.5702 | -5.8733 | 0.5963 | -5.8993 | 0.5996  |
| 2           | 0       | 0      | -5.7522 | 0.5621 | -6.1314 | 0.6084 | -6.1220 | 0.6084  |
| 3           | 0       | 0      | 0       | 0      | -5.8167 | 0.5652 | -6.3189 | 0.6151  |
| 4           | 0       | 0      | 0       | 0      | 0       | 0      | -5.4792 | 0.5300  |
| hs578T 1    | -4.5086 | 0.4295 | -4.7467 | 0.4523 | -4.7635 | 0.4538 | -4.7266 | 0.4506  |
| 2           | 0       | 0      | -4.6766 | 0.4369 | -4.8156 | 0.4496 | -4.9701 | 0.4688  |
| 3           | 0       | 0      | 0       | 0      | -5.4278 | 0.4730 | -5.0081 | 0.4626  |
| 4           | 0       | 0      | 0       | 0      | 0       | 0      | -5.4298 | 0.4732  |
| HCC1954 1   | -3.8277 | 0.3523 | -4.0674 | 0.3762 | -4.0849 | 0.3780 | -4.0849 | 0.3780  |
| 2           | 0       | 0      | -3.8424 | 0.3492 | -4.0080 | 0.3656 | -3.9826 | 0.3639  |
| 3           | 0       | 0      | 0       | 0      | -5.0037 | 0.4273 | -4.9538 | 0.4272  |
| 4           | 0       | 0      | 0       | 0      | 0       | 0      | -7.3042 | 0.5841  |

**Table 6. YAP Nuclear Scaling: Scaling parameter values for each cell line across DNA bins within each 'K', the cluster number used in kmeans clustering on the integrated Hoechst intensity. Log(a) is proportional to the initial YAP nuclear concentration and b is the power to which YAP nuclear concentration scales with cell area.**

| DNA bins    | K = 1   |        | K = 2   |         | K = 3   |         | K = 4   |         |
|-------------|---------|--------|---------|---------|---------|---------|---------|---------|
|             | log(a)  | b      | log(a)  | b       | log(a)  | b       | log(a)  | b       |
| T47D 1      | -3.2907 | 0.0224 | -3.0351 | -0.0046 | -3.2447 | 0.0091  | -3.2009 | 0.0043  |
| 2           | 0       | 0      | -1.8877 | -0.0807 | -2.2368 | -0.0715 | -2.1733 | -0.0782 |
| 3           | 0       | 0      | 0       | 0       | -1.8368 | -0.0847 | -1.8376 | -0.0895 |
| 4           | 0       | 0      | 0       | 0       | 0       | 0       | -1.8577 | -0.0792 |
| SUM149 1    | -4.9754 | 0.1230 | -4.7030 | 0.0919  | -4.6279 | 0.0836  | -4.6291 | 0.0837  |
| 2           | 0       | 0      | -4.1466 | 0.0612  | -3.6632 | 0.0130  | -3.6473 | 0.0112  |
| 3           | 0       | 0      | 0       | 0       | -3.1299 | 0.0121  | -2.9694 | -0.0013 |
| 4           | 0       | 0      | 0       | 0       | 0       | 0       | 2.6006  | -0.6672 |
| MDM MB231 1 | -3.4251 | 0.0754 | -3.0369 | 0.0299  | -3.0159 | 0.0260  | -3.0021 | 0.0245  |
| 2           | 0       | 0      | -2.4259 | -0.0033 | -1.6974 | -0.0735 | -1.6858 | -0.0747 |
| 3           | 0       | 0      | 0       | 0       | -3.2183 | 0.0843  | -3.1292 | 0.0744  |
| 4           | 0       | 0      | 0       | 0       | 0       | 0       | -3.2497 | 0.1093  |
| MDA MB157 1 | -4.7055 | 0.1107 | -4.2422 | 0.0670  | -4.1574 | 0.0472  | -4.1500 | 0.0465  |
| 2           | 0       | 0      | -2.6833 | -0.0168 | -2.1044 | -0.0919 | -2.1003 | -0.0923 |
| 3           | 0       | 0      | 0       | 0       | -2.1173 | -0.0573 | -2.1900 | -0.0532 |
| 4           | 0       | 0      | 0       | 0       | 0       | 0       | 0.5188  | -0.2218 |
| MCF10A 1    | -3.2935 | 0.0109 | -3.2132 | 0.0011  | -3.2116 | 0.0010  | -3.1906 | -0.0010 |
| 2           | 0       | 0      | -2.8392 | -0.0050 | -2.8533 | -0.0039 | -3.4012 | 0.0450  |
| 3           | 0       | 0      | 0       | 0       | -3.4502 | 0.0437  | -2.4171 | -0.0418 |
| 4           | 0       | 0      | 0       | 0       | 0       | 0       | -7.8275 | 0.4099  |
| MCF7 1      | -4.5767 | 0.0747 | -4.3844 | 0.0504  | -4.3828 | 0.0497  | -4.3587 | 0.0458  |
| 2           | 0       | 0      | -3.4590 | -0.0165 | -3.3509 | -0.0287 | -3.4847 | -0.0196 |
| 3           | 0       | 0      | 0       | 0       | -3.4782 | 0.0061  | -3.1605 | -0.0439 |
| 4           | 0       | 0      | 0       | 0       | 0       | 0       | -3.3726 | -0.0025 |
| JIMT1 1     | -4.1012 | 0.1410 | -3.7943 | 0.1088  | -3.6254 | 0.0880  | -3.6121 | 0.0864  |
| 2           | 0       | 0      | -2.9245 | 0.0500  | -3.3025 | 0.0703  | -3.3069 | 0.0704  |
| 3           | 0       | 0      | 0       | 0       | -3.0465 | 0.0607  | -2.7758 | 0.0368  |
| 4           | 0       | 0      | 0       | 0       | 0       | 0       | -3.3505 | 0.1035  |
| hs578T 1    | -3.7665 | 0.0705 | -3.3777 | 0.0309  | -3.3565 | 0.0287  | -3.3388 | 0.0245  |
| 2           | 0       | 0      | -2.2733 | -0.0349 | -2.0800 | -0.0521 | -2.1138 | -0.0646 |
| 3           | 0       | 0      | 0       | 0       | -1.2073 | -0.0972 | -2.2373 | -0.0379 |
| 4           | 0       | 0      | 0       | 0       | 0       | 0       | -1.2073 | -0.0972 |
| HCC1954 1   | -2.3998 | 0.0375 | -1.8529 | -0.0189 | -1.7912 | -0.0259 | -1.9462 | -0.0126 |
| 2           | 0       | 0      | -1.5727 | -0.0201 | -0.9309 | -0.0790 | -0.2789 | -0.1468 |
| 3           | 0       | 0      | 0       | 0       | -2.9907 | 0.1166  | -1.1521 | -0.0563 |
| 4           | 0       | 0      | 0       | 0       | 0       | 0       | -3.3299 | 0.1406  |

**Table 7. Population Characteristics: Cell area distribution statistics. 'G1' and 'G2' are defined via being above or below the median integrated Hoechst intensity**

| Population | G1 mean (µm <sup>2</sup> ) | G1 CV (%)   | G2 mean (µm <sup>2</sup> ) | G2 CV (%)   |
|------------|----------------------------|-------------|----------------------------|-------------|
| MCF7       | 1200                       | 0.6         | 1710                       | 0.52        |
| MDMMB231   | 1360                       | 0.49        | 1820                       | 0.48        |
| T47D       | 1420                       | 0.61        | 2760                       | 0.56        |
| JIMT1      | 1470                       | 0.57        | 2390                       | 0.49        |
| SUM149     | 1480                       | 0.57        | 1850                       | 0.53        |
| HCC1954    | 1840                       | 0.55        | 3060                       | 0.45        |
| MCF10A     | 2660                       | 0.63        | 3280                       | 0.6         |
| MDAMB157   | 3150                       | 0.61        | 4760                       | 0.56        |
| hs578T     | 3280                       | 0.47        | 4920                       | 0.44        |
| Average    | N/A                        | 0.57 ± 0.05 | N/A                        | 0.51 ± 0.05 |

| Reagent or Resource                                                 | Source                                       | Identifier                                                                                                                                        |
|---------------------------------------------------------------------|----------------------------------------------|---------------------------------------------------------------------------------------------------------------------------------------------------|
| <b>Antibodies</b>                                                   |                                              |                                                                                                                                                   |
| YAP Antibody (G-6) -Mouse                                           | Santa Cruz                                   | Cat# sc-376830                                                                                                                                    |
| YAP [67.3] -Mouse                                                   | Santa Cruz                                   | Cat# sc-101199                                                                                                                                    |
| TAZ (V386) Antibody -Rabbit                                         | Cell Signalling                              | Cat# 4883                                                                                                                                         |
| Tubulin Alpha Antibody — YL1/2 -Rat                                 | Bio-Rad                                      | Cat# MCA77G                                                                                                                                       |
| Phospho-Rb (Ser807/811) (D20B12) XP® -Rabbit                        | Cell Signalling                              | Cat# 8516S                                                                                                                                        |
| Recombinant Anti-Cyclin A2 antibody [EPR17351] -Rabbit              | Abcam                                        | Cat# ab181591                                                                                                                                     |
| Goat anti-Mouse IgG (H+L) Highly Cross-Adsorbed Secondary           | Invitrogen                                   | Cat# A11029                                                                                                                                       |
| Antibody, Alexa Fluor 488                                           |                                              |                                                                                                                                                   |
| Goat anti-Rabbit IgG (H+L) Highly Cross-Adsorbed Secondary          | Invitrogen                                   | Cat# A11034                                                                                                                                       |
| Antibody, Alexa Fluor 488                                           |                                              |                                                                                                                                                   |
| Goat anti-Mouse IgG (H+L) Cross-Adsorbed Secondary Anti-            | Invitrogen                                   | Cat# A11004                                                                                                                                       |
| body, Alexa Fluor 568                                               |                                              |                                                                                                                                                   |
| Goat anti-Rat IgG (H+L) Cross-Adsorbed Secondary Antibody,          | Invitrogen                                   | Cat# A11077                                                                                                                                       |
| Alexa Fluor 568                                                     |                                              |                                                                                                                                                   |
| Goat anti-Mouse IgG (H+L) Cross-Adsorbed Secondary Anti-            | Invitrogen                                   | Cat# A21235                                                                                                                                       |
| body, Alexa Fluor™ 647                                              |                                              |                                                                                                                                                   |
| F(ab') <sub>2</sub> -Goat anti-Rabbit IgG (H+L) Cross-Adsorbed Sec- | Invitrogen                                   | Cat# A21246                                                                                                                                       |
| ondary Antibody, Alexa Fluor 647                                    |                                              |                                                                                                                                                   |
| Goat anti-Rat IgG (H+L) Cross-Adsorbed Secondary Antibody,          | Invitrogen                                   | Cat# A21247                                                                                                                                       |
| Alexa Fluor 647                                                     |                                              |                                                                                                                                                   |
| <b>Bacterial and Virus Strains</b>                                  |                                              |                                                                                                                                                   |
| <b>Biological Samples</b>                                           |                                              |                                                                                                                                                   |
| <b>Chemicals, Peptides, and Recombinant Proteins</b>                |                                              |                                                                                                                                                   |
| RPMI 1640 Medium, no phenol red                                     | GIBCO                                        | Cat# 11835                                                                                                                                        |
| DMEM/F-12, GlutaMAX™ Supplement                                     | GIBCO                                        | Cat# 31331                                                                                                                                        |
| Horse Serum                                                         | GIBCO                                        | Cat# 16050                                                                                                                                        |
| Insulin                                                             | Sigma                                        | Cat# I-1882                                                                                                                                       |
| Cholera toxin                                                       | Sigma                                        | Cat# C-8052                                                                                                                                       |
| Hydrocortisone                                                      | Sigma                                        | Cat# H-0888                                                                                                                                       |
| Human EGF                                                           | Sigma                                        | Cat# E-9644                                                                                                                                       |
| Penicillin-Streptomycin                                             | GIBCO                                        | Cat# 15070                                                                                                                                        |
| Human EGF                                                           | Sigma                                        | Cat# E-9644                                                                                                                                       |
| RPMI 1640 Medium, no phenol red                                     | GIBCO                                        | Cat# 11835                                                                                                                                        |
| DMEM, high glucose, pyruvate                                        | GIBCO                                        | Cat# 41966                                                                                                                                        |
| Fetal Bovine Serum (heat-inactivated)                               | GIBCO                                        | Cat# 16140                                                                                                                                        |
| Trypsin-EDTA (0.25%), phenol red                                    | GIBCO                                        | Cat# 25200                                                                                                                                        |
| Opti-MEM I Reduced Serum Medium                                     | GIBCO                                        | Cat# 31985                                                                                                                                        |
| Lipofectamine RNAiMAX                                               | Invitrogen                                   | Cat# 13778                                                                                                                                        |
| Pierce 16% Formaldehyde (w/v), Methanol-free                        | Thermo Scientific                            | Cat# 28908                                                                                                                                        |
| Alexa Fluor 647 Phalloidin                                          | Invitrogen                                   | Cat# A22287                                                                                                                                       |
| Alexa Fluor 488 Phalloidin                                          | Invitrogen                                   | Cat# A-12379                                                                                                                                      |
| Hoechst 33258                                                       | Invitrogen                                   | Cat# H3569                                                                                                                                        |
| Palbociclib, PD0332991                                              | Sigma                                        | Cat# P20199                                                                                                                                       |
| Binimetinib                                                         | Sigma                                        | Cat#                                                                                                                                              |
| <b>Critical Commercial Assays</b>                                   |                                              |                                                                                                                                                   |
| <b>Deposited Data</b>                                               |                                              |                                                                                                                                                   |
| Proteome?                                                           |                                              |                                                                                                                                                   |
| <b>Experimental Models: Cell Lines</b>                              |                                              |                                                                                                                                                   |
| T47-D                                                               | N. Turner (ICR)                              | N/A                                                                                                                                               |
| BT474                                                               | N. Turner (ICR)                              | N/A                                                                                                                                               |
| MDA-MB-468                                                          | G. Poulgiannis (ICR)                         | N/A                                                                                                                                               |
| SKBR3                                                               | O. Rossanese (ICR)                           | N/A                                                                                                                                               |
| SUM159                                                              | R. Natrajan (ICR)                            | N/A                                                                                                                                               |
| MDA-MB-231                                                          | J. Erler (University of Copenhagen)          | N/A                                                                                                                                               |
| MDA-MB-231-LM2-4175                                                 | J. Massagué (Sloan Kettering Institute)      | N/A                                                                                                                                               |
|                                                                     | Minn, Andy J. et al., 2005                   |                                                                                                                                                   |
| MCF10A mRuby-PCNA                                                   | J. Mansfeld (Technische Universität Dresden) | N/A                                                                                                                                               |
|                                                                     | Zerjatke, Thomas et al., 2017                |                                                                                                                                                   |
| hTERT RPE-1                                                         |                                              |                                                                                                                                                   |
| WMs                                                                 |                                              |                                                                                                                                                   |
| a375p                                                               |                                              |                                                                                                                                                   |
| <b>Experimental Models: Organisms/Strains</b>                       |                                              |                                                                                                                                                   |
| <b>Oligonucleotides and siRNA (Sequenced-Based reagents)</b>        |                                              |                                                                                                                                                   |
| <b>Recombinant DNA</b>                                              |                                              |                                                                                                                                                   |
| <b>Software and Algorithms</b>                                      |                                              |                                                                                                                                                   |
| Morpheus                                                            | Broad Institute                              | <a href="https://software.broadinstitute.org/morpheus/">https://software.broadinstitute.org/morpheus/</a>                                         |
| Acapella 4.0                                                        | PerkinElmer                                  | N/A                                                                                                                                               |
| Columbus Image Data Storage and Analysis System                     | PerkinElmer                                  | <a href="http://columbus2.icr.ac.uk/login?next=/">http://columbus2.icr.ac.uk/login?</a>                                                           |
| Harmony High-Content Imaging and Analysis Software                  | PerkinElmer                                  | <a href="https://www.perkinelmer.com/product/harmony-5-1-office-hh17000012">https://www.perkinelmer.com/product/harmony-5-1-office-hh17000012</a> |
| Prism                                                               | GraphPad                                     | <a href="https://www.graphpad.com/scientific-software/prism/">https://www.graphpad.com/scientific-software/prism/</a>                             |
| Excel                                                               | Microsoft                                    | N/A                                                                                                                                               |
| ImageJ                                                              | Schneider et al., 2012                       | <a href="https://imagej.nih.gov/ij/">https://imagej.nih.gov/ij/</a>                                                                               |
| Adobe Illustrator                                                   | Figures                                      | <a href="http://www.adobe.com/de/products/illustrator.html">http://www.adobe.com/de/products/illustrator.html</a> ,<br>versionCC2015.3            |
| Other                                                               |                                              |                                                                                                                                                   |
| PhenoPlate 384-well                                                 | PerkinElmer                                  | Cat# 6057300                                                                                                                                      |

Table 8. List of reagents and resources.
