# Supplementary material for: YAP activation is robust to dilution
Source: Royal Society of Chemistry journal article supplement (doi:10.1039/d4mo00100a), 2024-08-14

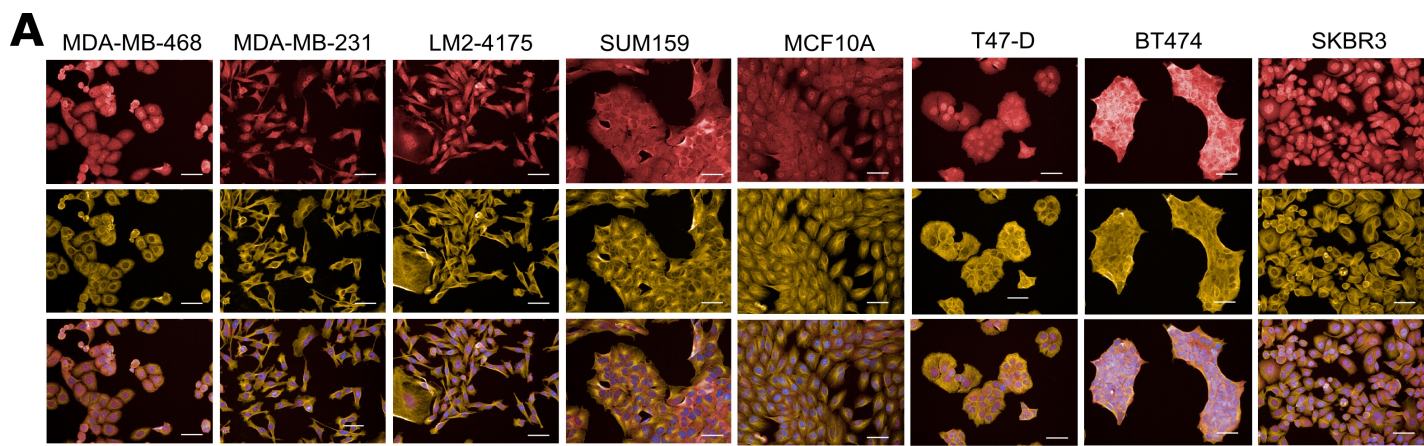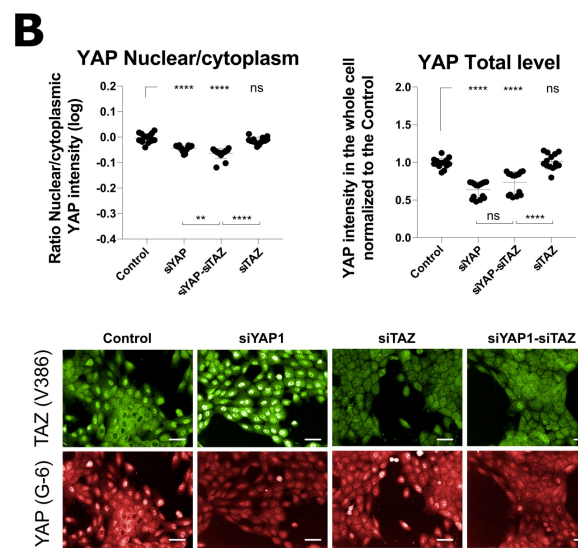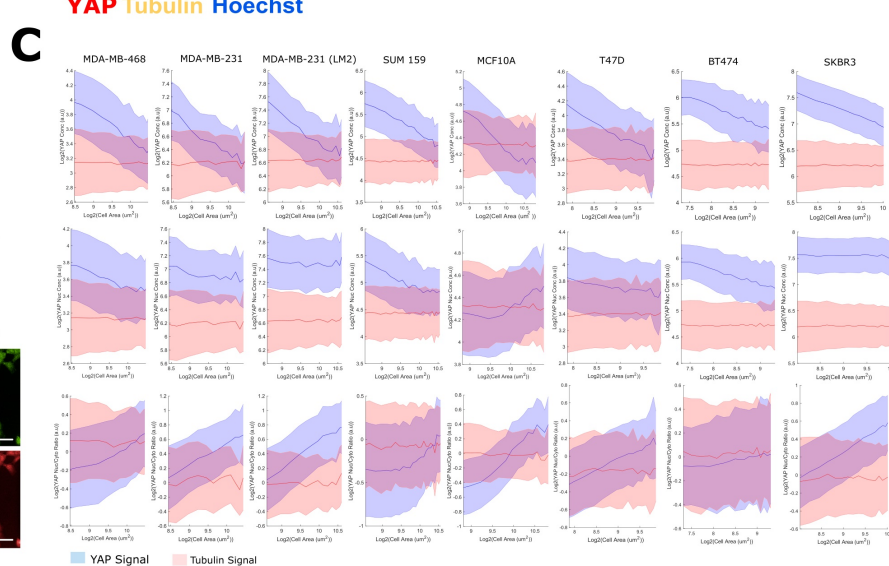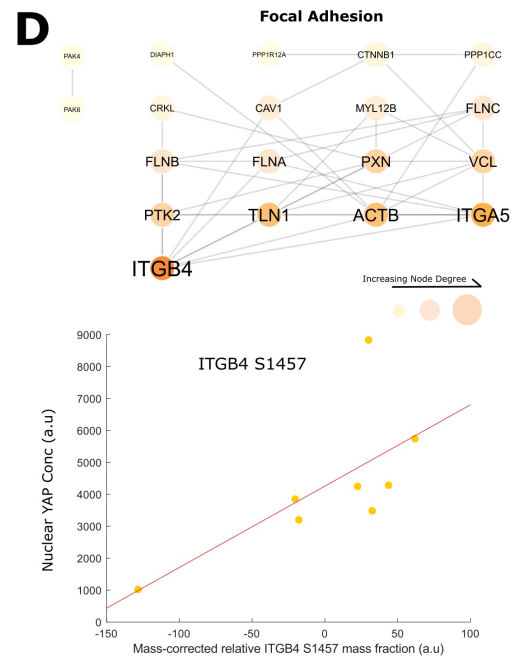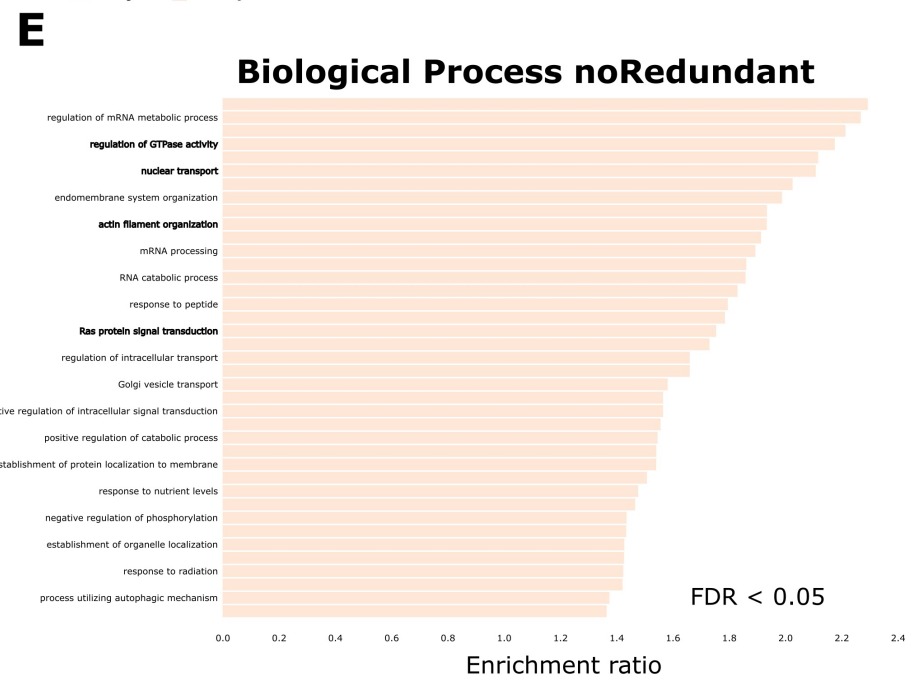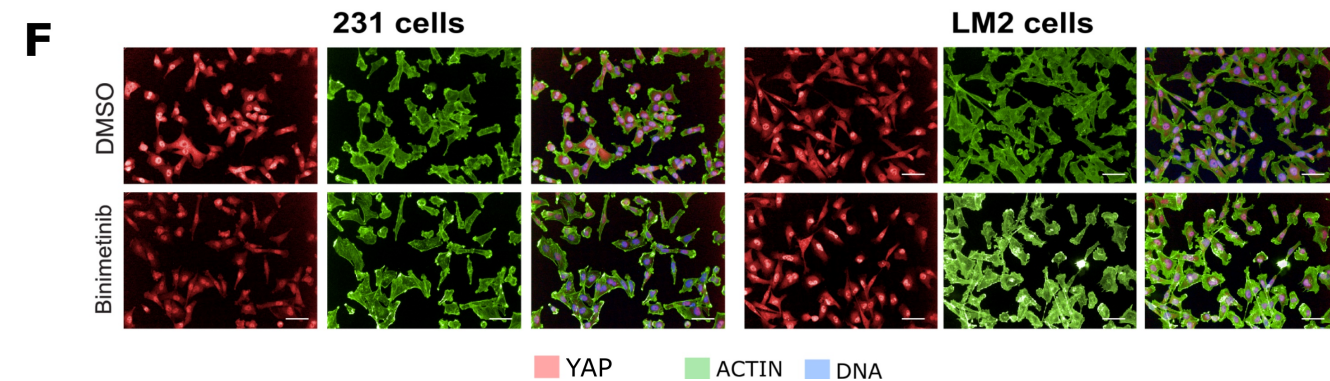

Supplement: d4mo00100a2.pdf [file d4mo00100a2.pdf]
