# Supplementary material for: YAP activation is robust to dilution
Source: Royal Society of Chemistry journal article supplement (doi:10.1039/d4mo00100a), 2024-08-14
Supplement: d4mo00100a4.pdf [file d4mo00100a4.pdf]

**A**

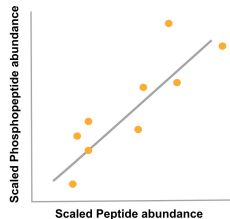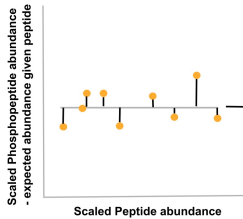

YAP nuc intensity matrix

+

Matrix of mass-corrected phosphopeptide abun.

**PLSR**

Score predictor variables with VIP

$$VIP_j = \sqrt{\frac{\sum_{l=1}^p w_{lj}^2 \cdot SSY_l \cdot J}{SSY_{total} \cdot F}}$$

Produces a ranked list of genes

| Variables | Score |
|-----------|-------|
| Gene x    | 3     |
| Gene y    | 2.8   |
| Gene z    | 2.6   |
| ...       | ...   |

Amenable to GSEA  
Gives biological insight
